# Supplementary material for: Abilities of the BRICHOS domain to prevent neurotoxicity and fibril formation are dependent on a highly conserved Asp residue
Source: RSC Chem Biol. 2022 Sep 15;3(11):1342–58. doi: 10.1039/d2cb00187j (PMC9627735; doi:10.1039/d2cb00187j)
Supplement: CB-003-D2CB00187J-s002 [file CB-003-D2CB00187J-s002.xlsx]

## Sheet: Sheet1
Supplementary Table 1		Pairwise % Identity
			0			50			100
Family, species and precursor length	#uniprot	0#A0A2B4RE82_STYPI@80-167	1#A0A2B4RE82_STYPI@472-559	2#A0A2B4S155_STYPI@75-160	3#A0A2B4S155_STYPI@289-375	4#A0A2B4R4P5_STYPI@47-135	5#A0A2B4R4P5_STYPI@179-267	6#A0A2B4SYR0_STYPI@27-107	7#A0A2B4SYR0_STYPI@223-309	8#C3YCY5_BRAFL@101-184	9#C3YCY5_BRAFL@398-489	10#C3YCY5_BRAFL@791-882	12#A0A218U7B6_9PASE@139-226	13#A0A218U7B6_9PASE@284-370	14#UPI0004F0E934@101-181	15#UPI0004F0E934@369-447	16#UPI000522B264@70-159	17#UPI000522B264@258-345	18#UPI0005326BF9@63-151	19#UPI0005326BF9@225-317	20#UPI00063CF406@84-172	21#UPI00063CF406@289-378	22#UPI00063CF406@559-649	23#UPI00063CF406@731-820	24#UPI00063CF406@1046-1135	25#UPI00063CF406@1192-1282	26#UPI00063CF406@1364-1453	27#UPI00063CF406@1671-1760	28#UPI00063CF406@1842-1931	29#UPI00063CF406@2171-2260	30#UPI00063CF406@2342-2431	31#UPI00063CF406@2696-2783	32#UPI00063CF406@2863-2950	33#UPI00063CF406@3042-3131	34#UPI00063CF406@3205-3294	35#UPI00063CF406@3369-3457	36#UPI00063CF406@3532-3620	37#UPI00063CF406@3704-3792	38#UPI00063CF406@3870-3957	39#UPI0006B750ED@101-181	40#UPI0006B750ED@364-441	41#UPI0006B7CA00@20-106	42#UPI0006B7CA00@163-251	43#UPI0006BA2613@101-176	44#UPI0006BA2613@233-310	45#UPI0006BA387C@67-155	46#UPI0006BA387C@278-368	47#UPI0006BA387C@449-538	48#UPI0006BA387C@799-888
II Stylophora pistillata 811 aa	0#A0A2B4RE82_STYPI@80-167		97	47	47	27	29	34	34	23	23	22	10	9	13	16	6	8	10	6	15	12	14	14	14	14	13	14	14	14	13	11	15	11	13	12	12	10	9	14	13	12	10	15	14	15	11	10	10
	1#A0A2B4RE82_STYPI@472-559	97		46	46	27	29	34	33	23	24	22	10	9	13	15	6	8	10	6	15	12	14	14	14	14	13	14	14	14	13	11	15	11	13	12	12	10	9	14	12	12	10	14	13	15	11	10	10
II Stylophora pistillata 444 aa	2#A0A2B4S155_STYPI@75-160	47	46		66	26	27	31	30	25	24	24	12	10	9	14	10	10	9	9	13	12	13	13	13	13	13	13	13	13	13	11	11	12	12	12	12	13	12	10	11	12	12	10	12	12	12	12	12
	3#A0A2B4S155_STYPI@289-375	47	46	66		31	30	26	27	23	23	22	10	14	11	15	10	9	7	10	12	10	12	12	12	12	12	12	12	12	12	10	14	11	10	11	11	9	10	12	13	12	14	13	14	10	10	10	10
II Stylophora pistillata 337 aa	4#A0A2B4R4P5_STYPI@47-135	27	27	26	31		74	33	39	20	20	22	11	11	14	20	10	10	8	11	15	10	9	11	9	9	11	10	11	10	11	14	13	11	9	9	10	9	11	13	18	15	12	17	20	13	12	11	11
	5#A0A2B4R4P5_STYPI@179-267	29	29	27	30	74		36	42	24	23	27	15	13	14	22	10	14	10	14	16	12	12	12	12	12	12	12	12	12	12	15	15	13	12	11	12	11	12	13	20	19	13	17	22	15	12	12	12
II Stylophora pistillata 423 aa	6#A0A2B4SYR0_STYPI@27-107	34	34	31	26	33	36		74	16	19	16	12	12	15	19	5	12	6	15	16	13	15	15	15	15	15	16	15	16	15	11	14	13	12	12	12	12	12	14	18	14	12	15	17	16	14	14	14
	7#A0A2B4SYR0_STYPI@223-309	34	33	30	27	39	42	74		18	20	22	12	13	13	21	7	16	6	16	17	14	15	15	16	15	15	16	15	16	15	10	15	13	14	13	13	12	12	15	20	14	13	17	20	17	15	15	15
CNMD Branchiostoma floridae 1010 aa	8#C3YCY5_BRAFL@101-184	23	23	25	23	20	24	16	18		78	84	14	16	11	12	9	13	10	17	13	14	14	15	14	14	14	14	15	14	14	15	15	15	13	13	13	15	14	15	16	17	17	15	16	13	13	13	13
	9#C3YCY5_BRAFL@398-489	23	24	24	23	20	23	19	20	78		80	13	15	14	18	9	14	8	16	13	13	13	14	14	13	13	14	14	14	13	13	14	14	14	12	12	15	13	16	13	14	15	17	14	14	13	13	13
	10#C3YCY5_BRAFL@791-882	22	22	24	22	22	27	16	22	84	80		12	15	13	18	8	15	8	17	13	12	12	14	13	12	13	13	14	13	13	13	14	13	13	11	11	13	12	15	15	15	16	17	18	13	12	12	12
GKN1 Lonchura striata domestica 709 aa	12#A0A218U7B6_9PASE@139-226	10	10	12	10	11	15	12	12	14	13	12		57	14	13	24	55	25	53	67	72	68	69	68	68	69	67	68	67	69	81	80	79	78	77	78	76	97	13	12	77	55	13	14	65	68	69	70
	13#A0A218U7B6_9PASE@284-370	9	9	10	14	11	13	12	13	16	15	15	57		13	13	28	59	29	64	52	53	49	51	51	49	53	51	52	51	53	56	52	54	53	52	53	57	57	13	12	51	87	16	14	49	51	53	54
proSP-C Acanthisitta chloris 448 aa	14#UPI0004F0E934@101-181	13	13	9	11	14	14	15	13	11	14	13	14	13		55	14	13	11	13	13	14	15	14	15	15	15	15	15	15	15	14	11	11	12	12	12	13	14	80	56	15	13	80	55	12	14	15	15
	15#UPI0004F0E934@369-447	16	15	14	15	20	22	19	21	12	18	18	13	13	55		14	15	13	15	14	15	14	15	14	14	15	14	15	14	15	13	11	13	14	14	14	13	13	55	76	14	13	56	73	15	15	16	16
GKN1 Opisthocomus hoazin 358 aa	16#UPI000522B264@70-159	6	6	10	10	10	10	5	7	9	9	8	24	28	14	14		24	73	29	24	23	24	22	25	24	24	25	23	25	24	25	25	23	21	23	22	24	24	12	12	24	26	14	11	24	23	24	25
	17#UPI000522B264@258-345	8	8	10	9	10	14	12	16	13	14	15	55	59	13	15	24		26	64	54	53	51	53	52	51	53	52	53	52	54	55	53	56	56	54	56	58	55	12	12	49	57	16	13	53	55	54	55
GKN1 Balearica regulorum gibbericeps 355 aa	18#UPI0005326BF9@63-151	10	10	9	7	8	10	6	6	10	8	8	25	29	11	13	73	26		28	26	26	27	24	27	27	27	27	26	27	27	26	26	26	23	25	24	26	25	11	11	25	29	13	9	26	26	25	26
	19#UPI0005326BF9@225-317	6	6	9	10	11	14	15	16	17	16	17	53	64	13	15	29	64	28		51	51	49	49	51	49	51	51	51	51	52	55	51	54	53	53	52	52	54	14	17	53	62	16	16	51	54	54	55
GKN1 Taeniopygia guttata 4581 aa	20#UPI00063CF406@84-172	15	15	13	12	15	16	16	17	13	13	13	67	52	13	14	24	54	26	51		78	79	77	79	79	79	80	78	80	79	69	77	78	72	72	73	70	66	12	10	67	54	13	12	88	74	77	78
	21#UPI00063CF406@289-378	12	12	12	10	10	12	13	14	14	13	12	72	53	14	15	23	53	26	51	78		91	88	89	91	89	88	88	88	88	68	76	82	77	76	76	79	71	13	11	69	53	12	13	75	86	86	85
	22#UPI00063CF406@559-649	14	14	13	12	9	12	15	15	14	13	12	68	49	15	14	24	51	27	49	79	91		86	99	100	87	98	86	98	86	64	76	80	74	73	73	77	70	14	12	65	49	13	12	74	82	86	85
	23#UPI00063CF406@731-820	14	14	13	12	11	12	15	15	15	14	14	69	51	14	15	22	53	24	49	77	88	86		87	86	96	88	98	88	97	69	73	79	76	74	73	78	68	13	11	68	48	13	13	75	83	85	84
	24#UPI00063CF406@1046-1135	14	14	13	12	9	12	15	16	14	14	13	68	51	15	14	25	52	27	51	79	89	99	87		99	88	99	87	99	87	64	76	79	75	74	73	78	70	14	12	65	51	14	12	74	83	87	86
	25#UPI00063CF406@1192-1282	14	14	13	12	9	12	15	15	14	13	12	68	49	15	14	24	51	27	49	79	91	100	86	99		87	98	86	98	86	64	76	80	74	73	73	77	70	14	12	65	49	13	12	74	82	86	85
	26#UPI00063CF406@1364-1453	13	13	13	12	11	12	15	15	14	13	13	69	53	15	15	24	53	27	51	79	89	87	96	88	87		89	96	89	98	68	75	79	76	74	73	78	68	14	11	67	51	14	13	75	82	84	85
	27#UPI00063CF406@1671-1760	14	14	13	12	10	12	16	16	14	14	13	67	51	15	14	25	52	27	51	80	88	98	88	99	98	89		88	100	88	65	74	80	74	73	72	79	69	14	12	63	51	14	12	76	84	88	87
	28#UPI00063CF406@1842-1931	14	14	13	12	11	12	15	15	15	14	14	68	52	15	15	23	53	26	51	78	88	86	98	87	86	96	88		88	97	67	74	78	75	73	72	76	67	14	11	67	49	14	13	76	83	85	84
	29#UPI00063CF406@2171-2260	14	14	13	12	10	12	16	16	14	14	13	67	51	15	14	25	52	27	51	80	88	98	88	99	98	89	100	88		88	65	74	80	74	73	72	79	69	14	12	63	51	14	12	76	84	88	87
	30#UPI00063CF406@2342-2431	13	13	13	12	11	12	15	15	14	13	13	69	53	15	15	24	54	27	52	79	88	86	97	87	86	98	88	97	88		69	75	79	76	74	73	78	68	14	11	68	51	14	13	76	83	85	86
	31#UPI00063CF406@2696-2783	11	11	11	10	14	15	11	10	15	13	13	81	56	14	13	25	55	26	55	69	68	64	69	64	64	68	65	67	65	69		66	73	73	71	72	71	78	13	12	83	59	13	14	68	69	69	70
	32#UPI00063CF406@2863-2950	15	15	11	14	13	15	14	15	15	14	14	80	52	11	11	25	53	26	51	77	76	76	73	76	76	75	74	74	74	75	66		76	72	73	75	73	79	10	8	67	52	11	10	71	70	73	74
	33#UPI00063CF406@3042-3131	11	11	12	11	11	13	13	13	15	14	13	79	54	11	13	23	56	26	54	78	82	80	79	79	80	79	80	78	80	79	73	76		86	88	85	89	79	10	9	69	54	9	11	74	78	82	83
	34#UPI00063CF406@3205-3294	13	13	12	10	9	12	12	14	13	14	13	78	53	12	14	21	56	23	53	72	77	74	76	75	74	76	74	75	74	76	73	72	86		96	95	79	77	11	10	71	50	11	12	73	77	74	75
	35#UPI00063CF406@3369-3457	12	12	12	11	9	11	12	13	13	12	11	77	52	12	14	23	54	25	53	72	76	73	74	74	73	74	73	73	73	74	71	73	88	96		95	80	77	11	10	69	51	11	12	72	76	75	76
	36#UPI00063CF406@3532-3620	12	12	12	11	10	12	12	13	13	12	11	78	53	12	14	22	56	24	52	73	76	73	73	73	73	73	72	72	72	73	72	75	85	95	95		79	78	11	10	71	50	10	12	73	75	72	73
	37#UPI00063CF406@3704-3792	10	10	13	9	9	11	12	12	15	15	13	76	57	13	13	24	58	26	52	70	79	77	78	78	77	78	79	76	79	78	71	73	89	79	80	79		74	12	11	66	54	13	12	67	75	79	80
	38#UPI00063CF406@3870-3957	9	9	12	10	11	12	12	12	14	13	12	97	57	14	13	24	55	25	54	66	71	70	68	70	70	68	69	67	69	68	78	79	79	77	77	78	74		13	12	75	55	13	14	64	68	69	70
proSP-C Pseudopodoces humilis 442 aa	39#UPI0006B750ED@101-181	14	14	10	12	13	13	14	15	15	16	15	13	13	80	55	12	12	11	14	12	13	14	13	14	14	14	14	14	14	14	13	10	10	11	11	11	12	13		60	14	13	84	59	11	14	15	15
	40#UPI0006B750ED@364-441	13	12	11	13	18	20	18	20	16	13	15	12	12	56	76	12	12	11	17	10	11	12	11	12	12	11	12	11	12	11	12	8	9	10	10	10	11	12	60		13	11	60	90	11	10	11	11
GKN1 Pseudopodoces humilis 286 aa	41#UPI0006B7CA00@20-106	12	12	12	12	15	19	14	14	17	14	15	77	51	15	14	24	49	25	53	67	69	65	68	65	65	67	63	67	63	68	83	67	69	71	69	71	66	75	14	13		51	13	15	65	67	66	67
	42#UPI0006B7CA00@163-251	10	10	12	14	12	13	12	13	17	15	16	55	87	13	13	26	57	29	62	54	53	49	48	51	49	51	51	49	51	51	59	52	54	50	51	50	54	55	13	11	51		16	13	51	51	53	54
proSP-C Geospiza fortis 311 aa	43#UPI0006BA2613@101-176	15	14	10	13	17	17	15	17	15	17	17	13	16	80	56	14	16	13	16	13	12	13	13	14	13	14	14	14	14	14	13	11	9	11	11	10	13	13	84	60	13	16		59	11	13	14	14
	44#UPI0006BA2613@233-310	14	13	12	14	20	22	17	20	16	14	18	14	14	55	73	11	13	9	16	12	13	12	13	12	12	13	12	13	12	13	14	10	11	12	12	12	12	14	59	90	15	13	59		13	12	13	13
GKN1 Geospiza fortis 2939 aa (a C-terminally truncated one less then 69 aa, #57 is not inlcuded here )	45#UPI0006BA387C@67-155	15	15	12	10	13	15	16	17	13	14	13	65	49	12	15	24	53	26	51	88	75	74	75	74	74	75	76	76	76	76	68	71	74	73	72	73	67	64	11	11	65	51	11	13		74	72	73
	46#UPI0006BA387C@278-368	11	11	12	10	12	12	14	15	13	13	12	68	51	14	15	23	55	26	54	74	86	82	83	83	82	82	84	83	84	83	69	70	78	77	76	75	75	68	14	10	67	51	13	12	74		92	91
	47#UPI0006BA387C@449-538	10	10	12	10	11	12	14	15	13	13	12	69	53	15	16	24	54	25	54	77	86	86	85	87	86	84	88	85	88	85	69	73	82	74	75	72	79	69	15	11	66	53	14	13	72	92		99
	48#UPI0006BA387C@799-888	10	10	12	10	11	12	14	15	13	13	12	70	54	15	16	25	55	26	55	78	85	85	84	86	85	85	87	84	87	86	70	74	83	75	76	73	80	70	15	11	67	54	14	13	73	91	99
	49#UPI0006BA387C@987-1077	14	14	13	13	12	13	16	17	14	13	13	65	51	16	17	23	52	23	49	76	87	85	93	86	85	91	87	93	87	92	65	72	76	72	71	69	75	64	16	12	63	49	15	14	74	86	87	86
	50#UPI0006BA387C@1199-1287	12	12	11	10	15	16	14	13	16	14	14	77	55	14	13	25	54	26	55	69	71	66	69	66	66	68	65	67	65	69	89	67	69	71	69	69	68	74	13	12	85	57	13	14	68	70	69	70
	51#UPI0006BA387C@1424-1511	14	14	11	14	13	14	15	16	13	12	11	71	47	14	12	26	49	26	51	73	73	76	71	76	76	73	74	72	74	73	61	86	75	71	73	72	70	71	13	9	61	48	13	9	69	70	72	73
	52#UPI0006BA387C@1601-1690	12	12	12	11	12	14	13	14	15	15	14	77	54	11	13	23	58	26	55	78	80	76	79	77	76	79	78	78	78	79	74	76	92	85	85	85	84	77	10	9	70	54	10	11	74	81	78	79
	53#UPI0006BA387C@1771-1860	12	12	12	11	12	14	13	14	15	15	14	77	54	11	13	23	58	26	55	78	80	76	79	77	76	79	78	78	78	79	74	76	92	85	85	85	84	77	10	9	70	54	10	11	74	81	78	79
	54#UPI0006BA387C@1935-2024	11	11	12	10	11	13	12	14	13	13	12	76	54	13	16	22	55	22	53	69	76	73	75	74	73	75	73	74	73	75	70	71	82	92	93	89	78	76	13	12	68	52	13	14	70	78	77	78
	55#UPI0006BA387C@2105-2159	14	14	11	11	9	13	14	16	14	14	14	61	54	12	13	22	58	27	52	75	79	75	77	77	75	77	78	77	78	77	61	69	85	75	75	75	80	63	11	6	61	58	11	10	68	80	75	75
	56#UPI0006BA387C@2193-2282	11	11	12	10	10	12	12	14	13	13	12	74	54	13	16	22	55	23	53	68	76	73	75	74	73	75	73	74	73	75	70	70	83	93	94	88	78	74	13	12	67	52	13	14	69	78	77	78
	58#UPI0006BA387C@2459-2548	9	9	13	9	11	13	12	15	15	15	14	73	57	12	15	23	58	24	55	71	79	75	78	76	75	78	77	76	77	78	69	69	86	80	81	78	90	73	12	11	65	55	12	14	68	81	79	80
	59#UPI0006BA387C@2627-2712	12	12	11	12	13	14	11	12	14	13	12	88	53	14	13	24	53	23	50	64	69	65	67	65	65	67	64	66	64	67	80	74	72	73	71	73	70	86	13	12	76	52	13	14	63	67	66	67
	60#UPI0006BA387C@2818-2904	10	10	10	15	11	12	12	12	14	12	13	55	90	12	14	26	57	29	61	52	52	48	49	49	48	52	49	51	49	52	56	51	54	51	52	51	54	55	12	11	49	88	15	13	49	49	52	53
GKN1 Sturnus vulgaris 308 aa	61#UPI00071A4366@9-96	9	9	12	10	12	12	12	14	14	14	13	89	56	15	14	23	54	24	54	66	72	69	69	69	69	69	68	67	68	69	77	74	77	74	74	76	74	89	14	13	73	54	14	15	65	68	69	70
	62#UPI00071A4366@185-273	11	11	11	14	14	14	16	17	17	14	15	53	87	12	13	25	54	27	59	51	49	46	47	47	46	48	47	47	47	48	55	48	53	50	51	50	53	53	12	12	51	87	15	14	48	47	49	51
proSP-C Parus major 710 aa	63#UPI0007711DC3@101-181	14	14	10	12	14	14	16	16	12	15	14	14	13	81	56	13	12	12	14	13	14	15	14	15	15	15	15	15	15	15	14	11	11	12	12	12	13	14	94	61	15	13	83	61	12	15	16	16
	64#UPI0007711DC3@632-709	13	12	10	12	19	20	17	20	16	13	16	12	12	54	76	11	12	10	17	10	11	10	11	10	10	11	10	11	10	11	12	8	9	10	10	10	9	12	58	98	13	11	57	90	11	10	11	11
proSP-C Lepidothrix coronata 433 aa	65#UPI000819BFD0@100-178	15	15	11	14	15	15	17	16	11	16	15	14	14	84	57	13	14	12	16	13	14	15	14	15	15	15	15	15	15	15	14	11	11	12	12	12	13	14	88	61	15	14	84	61	12	15	16	16
	66#UPI000819BFD0@355-432	14	13	11	13	19	21	17	20	15	14	16	12	12	55	77	10	14	11	16	12	13	12	13	12	12	13	12	13	12	13	12	9	11	12	12	12	11	12	61	90	13	13	60	86	13	12	13	13
GKN1 Serinus canaria 436 aa (a C-terminally truncated one less than 69 aa, #69 is not inlcuded here )	67#UPI0008DB7E38@48-137	10	10	12	8	9	12	11	14	15	14	13	72	54	12	15	23	57	23	53	69	79	78	74	77	78	74	76	72	76	74	66	68	84	78	77	77	85	73	12	11	65	53	11	14	65	75	75	76
	68#UPI0008DB7E38@226-314	10	10	11	9	12	13	12	14	14	13	12	77	57	12	15	24	56	24	52	71	78	73	77	74	73	77	73	76	73	77	71	74	84	82	85	82	82	76	12	11	69	53	13	13	68	74	79	80
II Stylophora pistillata 404 aa	70#UPI000C0481E2@71-159	27	27	26	31	100	74	33	39	20	20	22	11	11	14	20	10	10	8	11	15	10	9	11	9	9	11	10	11	10	11	14	13	11	9	9	10	9	11	13	18	15	12	17	20	13	12	11	11
	71#UPI000C0481E2@263-351	29	29	27	30	74	100	36	42	24	23	27	15	13	14	22	10	14	10	14	16	12	12	12	12	12	12	12	12	12	12	15	15	13	12	11	12	11	12	13	20	19	13	17	22	15	12	12	12
GKN1 Cyanistes caeruleus 895 aa	72#UPI000CDB70BF@67-154	12	12	11	10	13	15	14	16	14	12	12	66	50	16	17	22	50	24	51	78	78	73	71	73	73	72	72	72	72	72	62	70	72	71	71	72	66	66	16	12	69	50	16	14	74	76	74	74
	73#UPI000CDB70BF@265-353	13	13	12	10	13	15	17	20	16	15	15	65	50	17	18	22	52	24	53	74	83	77	82	78	77	82	79	83	79	83	65	68	73	71	70	70	71	63	17	14	70	50	16	16	72	82	83	83
	74#UPI000CDB70BF@504-592	13	13	12	10	13	15	17	19	16	15	15	65	50	17	18	22	52	24	53	74	83	77	82	78	77	82	79	83	79	83	65	68	73	71	70	70	71	63	17	13	70	50	16	15	72	82	83	83
	75#UPI000CDB70BF@772-858	13	13	12	12	15	19	14	14	18	15	16	74	49	15	14	24	48	25	52	66	68	63	67	63	63	66	62	66	62	67	80	67	67	69	67	69	63	72	14	12	97	50	13	14	63	66	65	66
[truncated: 25 more columns]
